# Supplementary material for: Accumulation, biotransformation, and multi-biomarker responses after exposure to arsenic species in the earthworm Eisenia fetida
Source: Royal Society of Chemistry journal article supplement (doi:10.1039/c5tx00396b), 2016-01-01
Supplement: c5tx00396b1.pdf [file c5tx00396b1.pdf]

## Supplementary Information

### **Accumulation, biotransformation, and multi-biomarker responses after exposure to arsenic species in the earthworm *Eisenia fetida***

Zhifeng Wang, Zhaojie Cui\*

School of Environmental Science and Engineering, Shandong University, No. 27 Shanda South  
Road, Jinan 250100, PR China.

\***Corresponding author.** E-mail address: [cuiwj@sdu.edu.cn](mailto:cuiwj@sdu.edu.cn) (Z. Cui). Tel/Fax: +86 531 88361176.

**Table S1** Concentration (mg kg<sup>-1</sup> dry wt) of four As species and total As in *E. fetida* following 64 days exposure to As contaminated soils. Earthworms of group I, II, III, IV were exposed to arsenite [As (III)], arsenate [As (V)], monomethylarsonate (MMA) and dimethylarsinate (DMA), respectively.

| Experimental group | Exposure days | As in <i>E. fetida</i> (mg kg <sup>-1</sup> dry wt) |       |        |        |          |
|--------------------|---------------|-----------------------------------------------------|-------|--------|--------|----------|
|                    |               | As(III)                                             | As(V) | MMA    | DMA    | Total As |
| Group I            | 2d            | 14.36                                               | 6.13  | N.D.   | N.D.   | 22.27    |
|                    | 4d            | 18.64                                               | 8.35  | N.D.   | N.D.   | 29.45    |
|                    | 8d            | 20.12                                               | 11.05 | N.D.   | 1.16   | 35.79    |
|                    | 16d           | 25.86                                               | 15.33 | 1.27   | 5.37   | 52.44    |
|                    | 32d           | 40.57                                               | 25.49 | 1.64   | 7.79   | 87.22    |
|                    | 64d           | 42.25                                               | 24.10 | 4.11   | 11.72  | 94.85    |
| Group II           | 2d            | 6.49                                                | 18.50 | N.D.   | N.D.   | 26.78    |
|                    | 4d            | 10.13                                               | 23.67 | N.D.   | N.D.   | 36.56    |
|                    | 8d            | 14.29                                               | 22.43 | N.D.   | N.D.   | 40.32    |
|                    | 16d           | 17.20                                               | 25.36 | 3.22   | 4.31   | 60.59    |
|                    | 32d           | 28.17                                               | 39.89 | 1.28   | 10.21  | 95.14    |
|                    | 64d           | 27.02                                               | 42.14 | 2.64   | 10.71  | 99.40    |
| Group III          | 2d            | N.D.                                                | 5.50  | 60.49  | 22.31  | 97.32    |
|                    | 4d            | 1.42                                                | 6.78  | 140.32 | 45.77  | 210.58   |
|                    | 8d            | 2.68                                                | 7.12  | 166.28 | 59.17  | 265.82   |
|                    | 16d           | 3.81                                                | 6.42  | 123.95 | 45.31  | 221.34   |
|                    | 32d           | 5.13                                                | 11.47 | 82.75  | 31.56  | 181.18   |
|                    | 64d           | 7.67                                                | 14.22 | 68.72  | 25.95  | 167.39   |
| Group IV           | 2d            | N.D.                                                | 6.59  | 8.22   | 73.14  | 113.06   |
|                    | 4d            | N.D.                                                | 6.80  | 15.79  | 182.61 | 269.47   |
|                    | 8d            | 2.01                                                | 7.02  | 18.10  | 205.90 | 295.55   |
|                    | 16d           | 2.65                                                | 7.20  | 14.35  | 144.76 | 229.80   |
|                    | 32d           | 6.19                                                | 12.12 | 18.04  | 83.06  | 145.37   |
|                    | 64d           | 7.00                                                | 13.94 | 11.73  | 57.51  | 106.74   |

N.D. = below limit of quantification or not detected.

**Table S2** Multi-biomarker responses in *E. fetida* following 64 days exposure to As contaminated soils. Earthworms of group I, II, III, IV was exposed to As(III), As(V), MMA and DMA, respectively.

| Biomarker parameter              | Exposure days | Biomarker responses in <i>E. fetida</i> |         |          |           |          |
|----------------------------------|---------------|-----------------------------------------|---------|----------|-----------|----------|
|                                  |               | Control                                 | Group I | Group II | Group III | Group IV |
| SOD<br>(U mg <sup>-1</sup> prot) | 2d            | 70.34                                   | 105.37  | 88.08    | 75.59     | 74.31    |
|                                  | 4d            | 71.56                                   | 126.55  | 98.26    | 77.30     | 76.48    |
|                                  | 8d            | 68.91                                   | 137.74  | 119.92   | 73.02     | 75.37    |
|                                  | 16d           | 67.50                                   | 103.33  | 96.15    | 76.32     | 72.85    |
|                                  | 32d           | 70.12                                   | 60.47   | 64.77    | 87.12     | 84.99    |
|                                  | 64d           | 68.13                                   | 50.80   | 57.27    | 86.67     | 84.42    |

|                                                 |     |        |        |        |        |        |
|-------------------------------------------------|-----|--------|--------|--------|--------|--------|
| CAT                                             | 2d  | 319.52 | 363.63 | 357.33 | 335.40 | 326.18 |
| (U g <sup>-1</sup> prot)                        | 4d  | 316.32 | 389.24 | 381.81 | 328.93 | 326.59 |
|                                                 | 8d  | 317.31 | 391.13 | 375.10 | 325.76 | 326.80 |
|                                                 | 16d | 320.65 | 348.40 | 336.82 | 315.37 | 316.01 |
|                                                 | 32d | 320.93 | 246.11 | 279.94 | 349.96 | 351.51 |
|                                                 | 64d | 315.48 | 260.09 | 275.88 | 351.76 | 354.69 |
| GPx                                             | 2d  | 9.10   | 14.68  | 11.25  | 9.49   | 9.03   |
| (nmol•min <sup>-1</sup> •mg <sup>-1</sup> prot) | 4d  | 9.02   | 13.72  | 12.07  | 9.56   | 9.38   |
|                                                 | 8d  | 9.24   | 11.67  | 10.39  | 9.44   | 9.20   |
|                                                 | 16d | 9.15   | 8.13   | 9.26   | 9.37   | 8.98   |
|                                                 | 32d | 8.97   | 6.06   | 7.74   | 9.54   | 9.69   |
|                                                 | 64d | 8.92   | 6.90   | 7.47   | 10.22  | 10.13  |
| GST                                             | 2d  | 75.79  | 114.33 | 93.67  | 82.18  | 80.66  |
| (nmol•min <sup>-1</sup> •mg <sup>-1</sup> prot) | 4d  | 75.44  | 121.48 | 109.74 | 86.62  | 82.31  |
|                                                 | 8d  | 78.38  | 103.26 | 87.21  | 80.02  | 79.65  |
|                                                 | 16d | 76.25  | 82.22  | 78.26  | 77.55  | 77.13  |
|                                                 | 32d | 74.83  | 58.09  | 64.48  | 78.50  | 81.36  |
|                                                 | 64d | 73.21  | 60.28  | 63.30  | 79.46  | 82.11  |
| GR                                              | 2d  | 6.08   | 7.25   | 6.67   | 6.31   | 5.99   |
| (U g <sup>-1</sup> prot)                        | 4d  | 5.80   | 8.86   | 8.32   | 6.41   | 6.10   |
|                                                 | 8d  | 6.01   | 9.72   | 9.31   | 6.83   | 6.58   |
|                                                 | 16d | 5.97   | 9.33   | 8.25   | 6.90   | 6.83   |
|                                                 | 32d | 5.92   | 7.07   | 6.38   | 7.25   | 7.01   |
|                                                 | 64d | 6.12   | 6.29   | 6.31   | 7.31   | 7.13   |
| GSH                                             | 2d  | 23.12  | 14.35  | 17.33  | 23.78  | 23.42  |
| (µmol g <sup>-1</sup> prot)                     | 4d  | 25.30  | 21.74  | 24.21  | 23.48  | 24.16  |
|                                                 | 8d  | 24.95  | 33.14  | 31.19  | 26.17  | 26.48  |
|                                                 | 16d | 24.37  | 41.61  | 38.02  | 28.99  | 26.74  |
|                                                 | 32d | 22.56  | 30.18  | 25.27  | 28.87  | 27.13  |
|                                                 | 64d | 22.79  | 25.07  | 23.59  | 35.42  | 33.03  |
| MDA                                             | 2d  | 1.17   | 1.44   | 1.39   | 1.16   | 1.13   |
| (nmol mg <sup>-1</sup> prot)                    | 4d  | 1.11   | 1.59   | 1.43   | 1.24   | 1.17   |
|                                                 | 8d  | 1.18   | 1.43   | 1.42   | 1.29   | 1.21   |
|                                                 | 16d | 1.20   | 1.75   | 1.66   | 1.31   | 1.25   |
|                                                 | 32d | 1.09   | 1.97   | 1.78   | 1.12   | 1.13   |
|                                                 | 64d | 1.14   | 1.66   | 1.51   | 1.15   | 1.17   |
| MTs                                             | 2d  | 167.86 | 234.84 | 193.99 | 175.12 | 179.57 |
| (nmol-SH g <sup>-1</sup> prot)                  | 4d  | 168.09 | 273.45 | 206.05 | 180.39 | 171.65 |
|                                                 | 8d  | 167.78 | 305.08 | 237.94 | 189.55 | 188.23 |
|                                                 | 16d | 166.54 | 326.30 | 271.82 | 194.41 | 190.77 |
|                                                 | 32d | 168.62 | 380.96 | 320.11 | 216.52 | 219.27 |
|                                                 | 64d | 167.16 | 387.88 | 326.07 | 221.65 | 216.74 |

SOD = superoxide dismutase, CAT = catalase, GPx = glutathione peroxidase, GST = glutathione S-transferase, GR = glutathione reductase, GSH = reduced glutathione, MDA = malondialdehyde, MTs = metallothioneins.

**Table S3** Integrated biomarker responses (IBR) values in *E. fetida* following 64 days exposure to As contaminated soils. Earthworms of group I, II, III, IV was exposed to As(III), As(V), MMA and DMA, respectively.

| Exposure days | IBR values |          |           |          |
|---------------|------------|----------|-----------|----------|
|               | Group I    | Group II | Group III | Group IV |
| 2d            | 33.77      | 20.23    | 11.76     | 13.93    |
| 4d            | 42.27      | 27.23    | 11.95     | 10.03    |
| 8d            | 39.72      | 27.47    | 10.97     | 10.76    |
| 16d           | 34.69      | 23.88    | 12.78     | 11.91    |
| 32d           | 41.73      | 27.51    | 13.66     | 13.39    |
| 64d           | 33.08      | 25.89    | 16.64     | 15.94    |
